# Supplementary material for: On the skill of raw and post-processed ensemble seasonal meteorological forecasts in Denmark
Source: Copernicus journal article supplement (doi:10.5194/hess-22-6591-2018), 2018-12-21
Supplement: Supplementary file 1 [file hess-22-6591-2018-supplement.pdf]

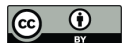

*Supplement of*

## **On the skill of raw and post-processed ensemble seasonal meteorological forecasts in Denmark**

**Diana Lucatero et al.**

*Correspondence to:* Diana Lucatero ([diana.lucatero@ign.ku.dk](mailto:diana.lucatero@ign.ku.dk))

The copyright of individual parts of the supplement might differ from the CC BY 4.0 License.

## Precipitation

Mar

Apr

May

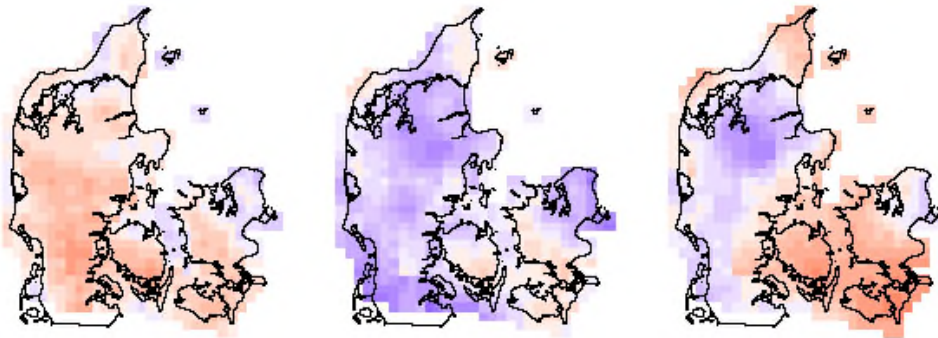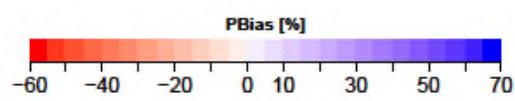

## Temperature

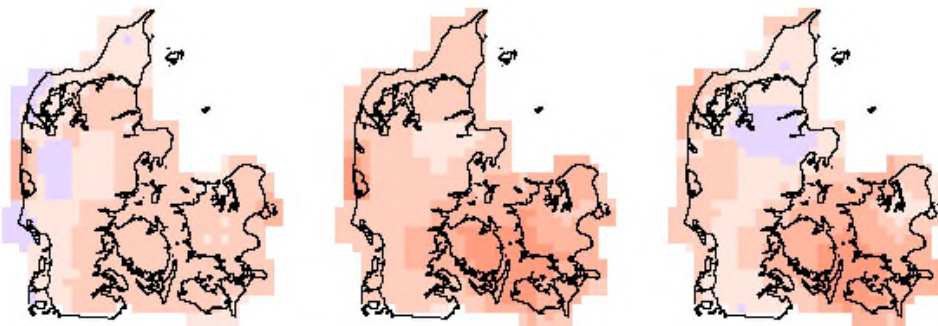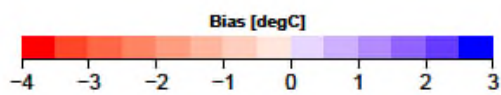

## Reference Evapotranspiration

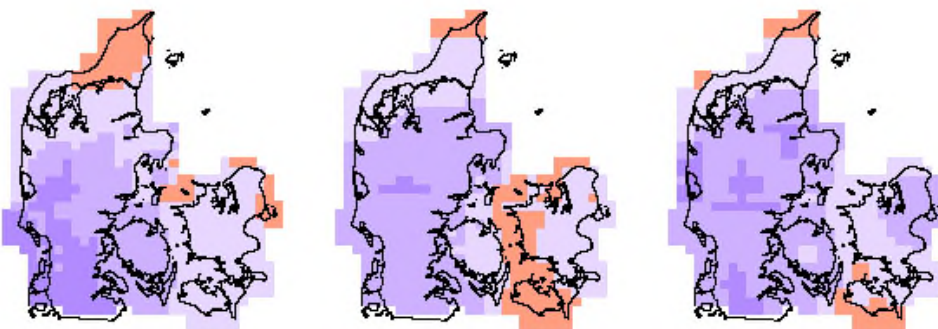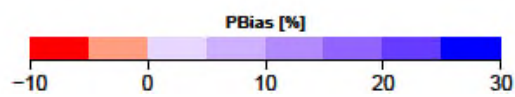

**Figure S1:** As in Fig. 4, but for spring.

## Precipitation

Sep

Oct

Nov

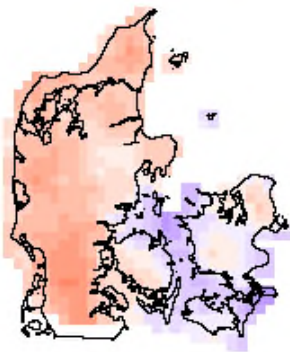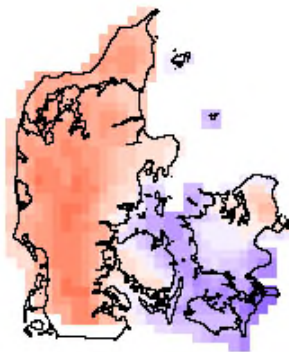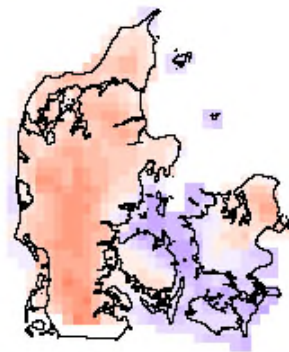

PBias [%]

-60 -40 -20 0 10 30 50 70

## Temperature

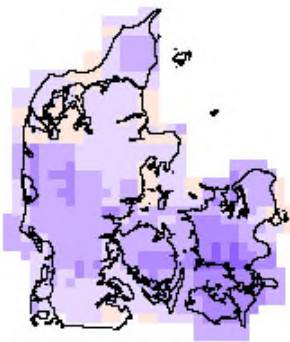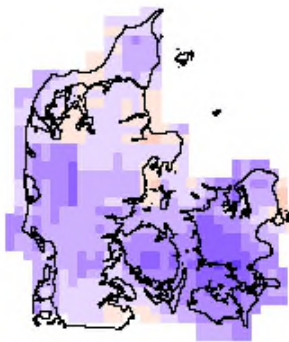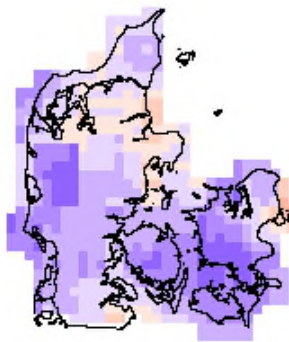

Bias [degC]

-4 -3 -2 -1 0 1 2 3

## Reference Evapotranspiration

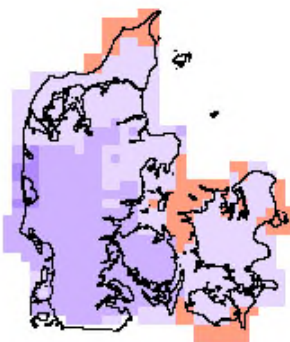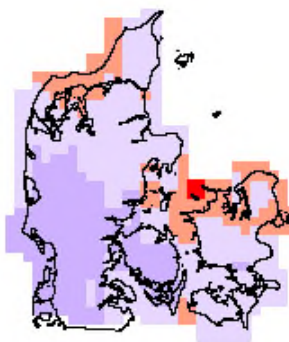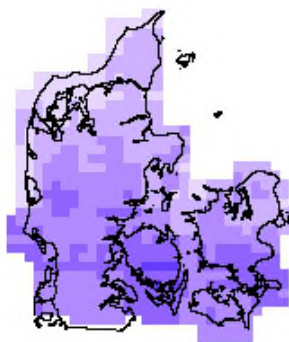

PBias [%]

-10 0 10 20 30

**Figure S2:** As in Fig. 4, but for autumn.

## Precipitation

Dec

Jan

Feb

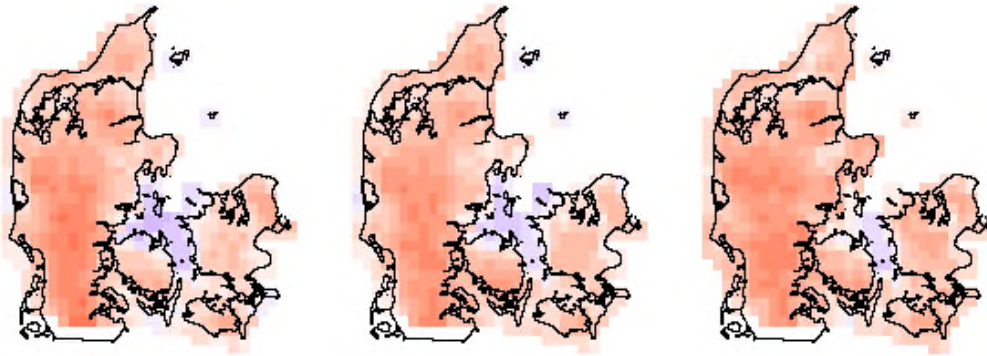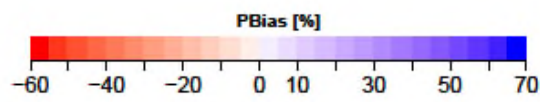

## Temperature

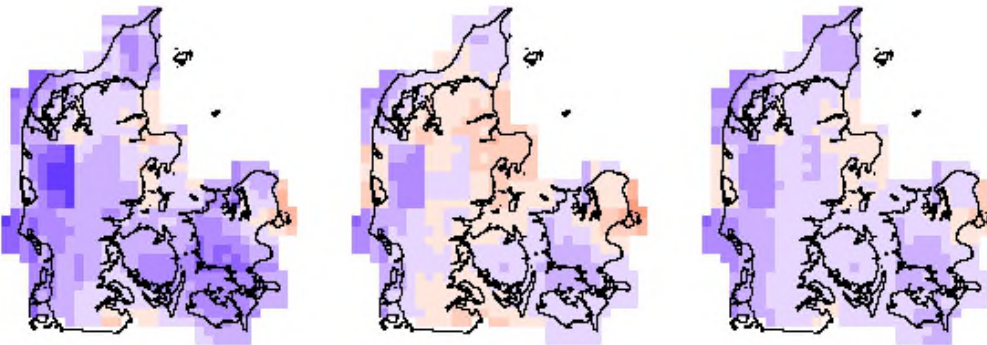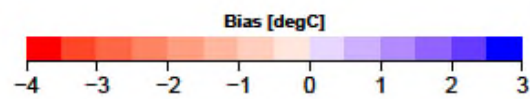

## Reference Evapotranspiration

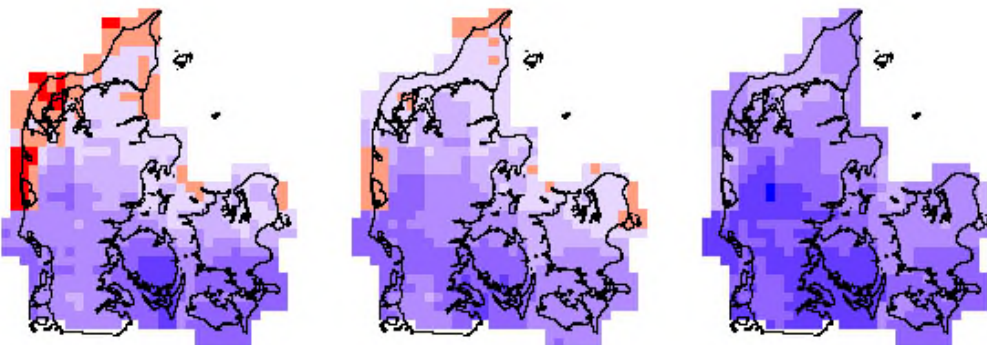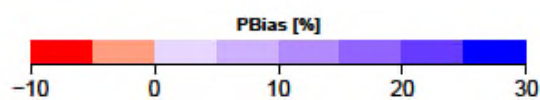

**Figure S3:** As in Fig. 4, but for winter.



## Precipitation

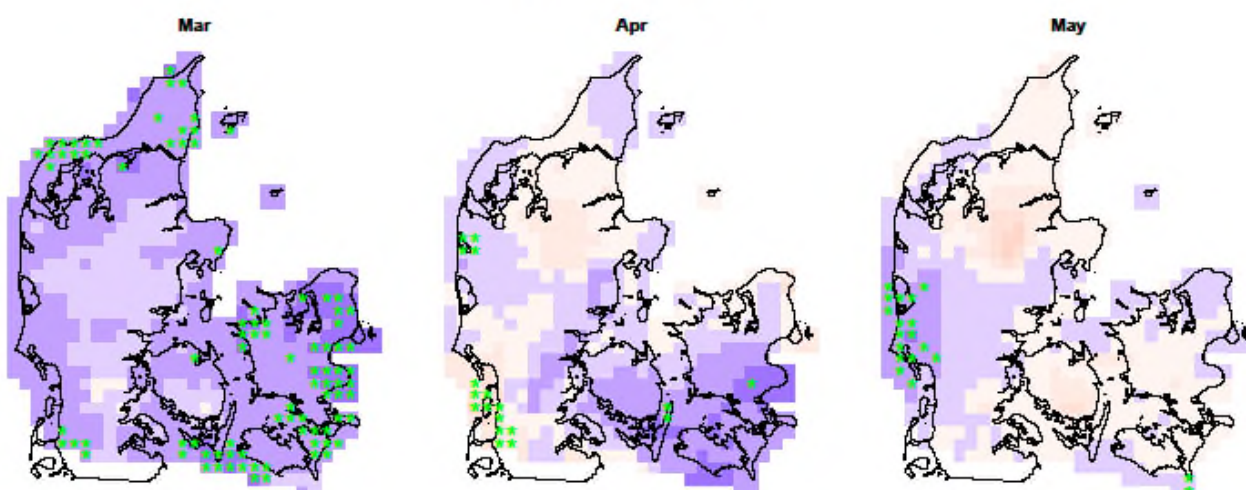

## Temperature

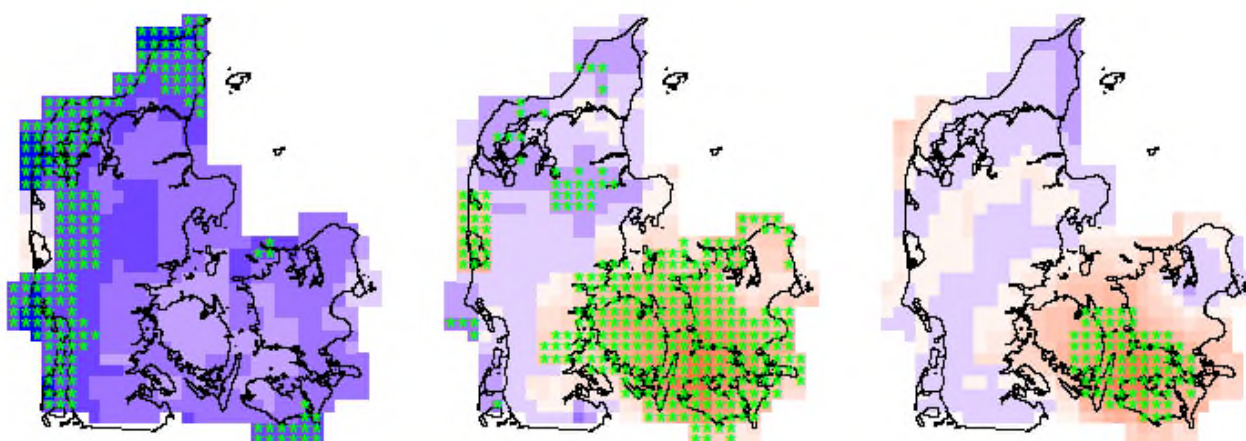

## Reference Evapotranspiration

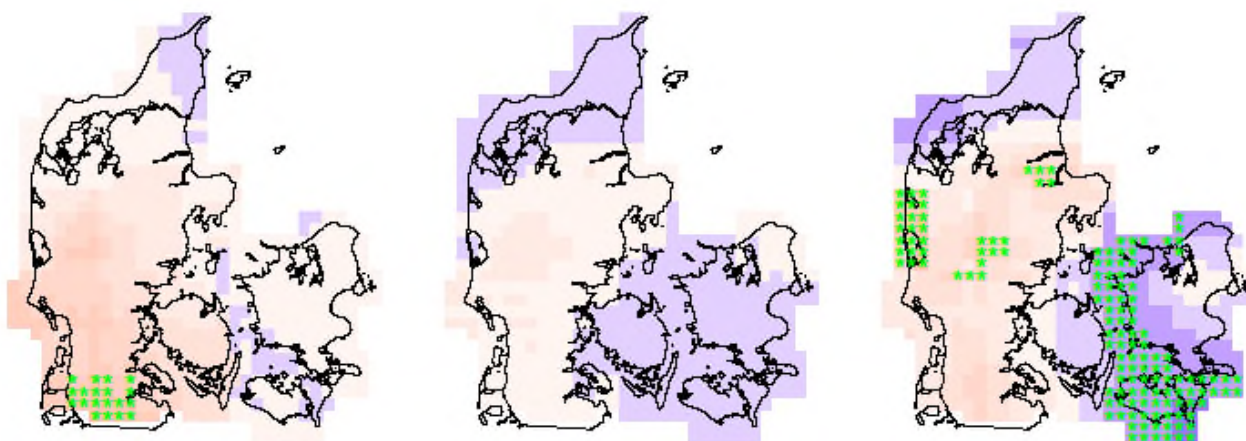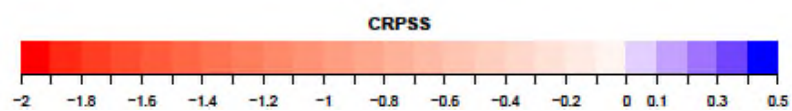



**Figure S4:** As in Fig. 6, but for spring.

## Precipitation

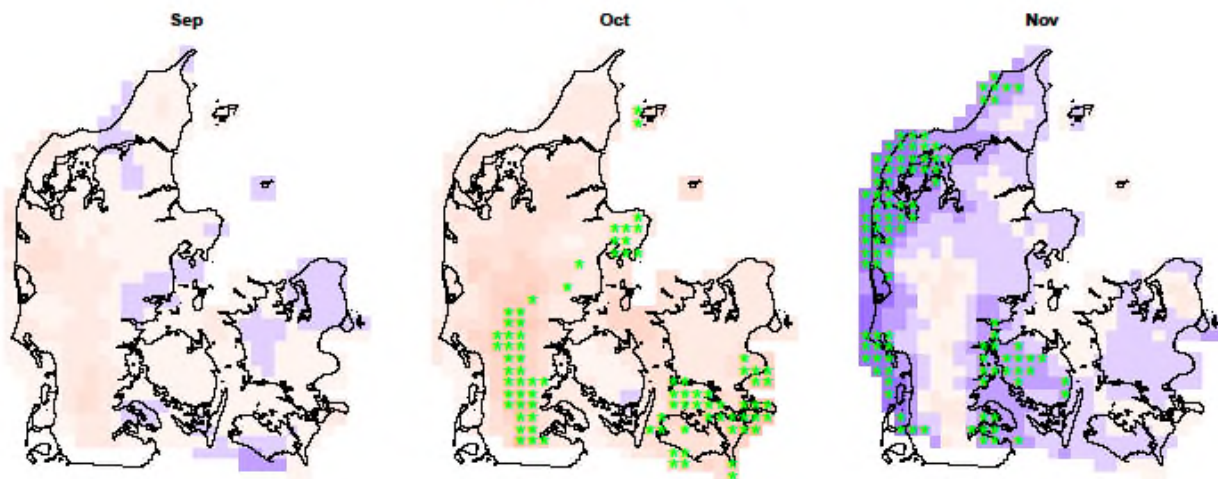

## Temperature

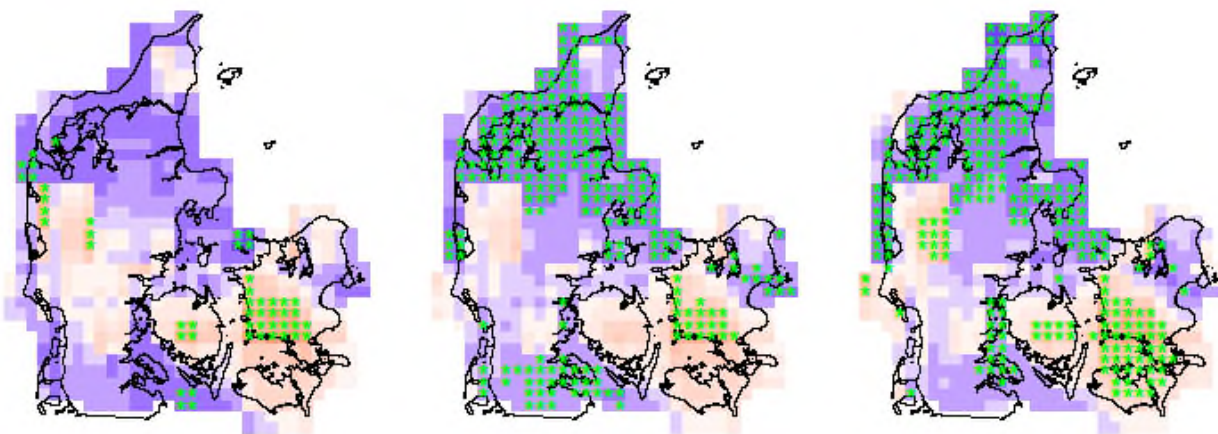

## Reference Evapotranspiration

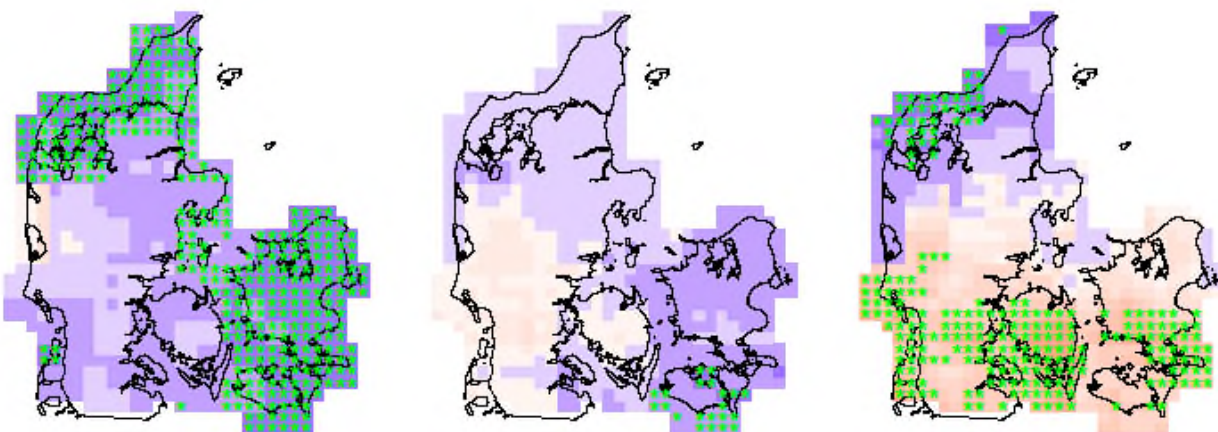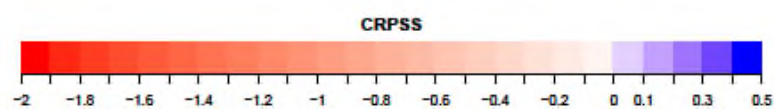

**Figure S5:** As in Fig. 6, but for autumn.



## Precipitation

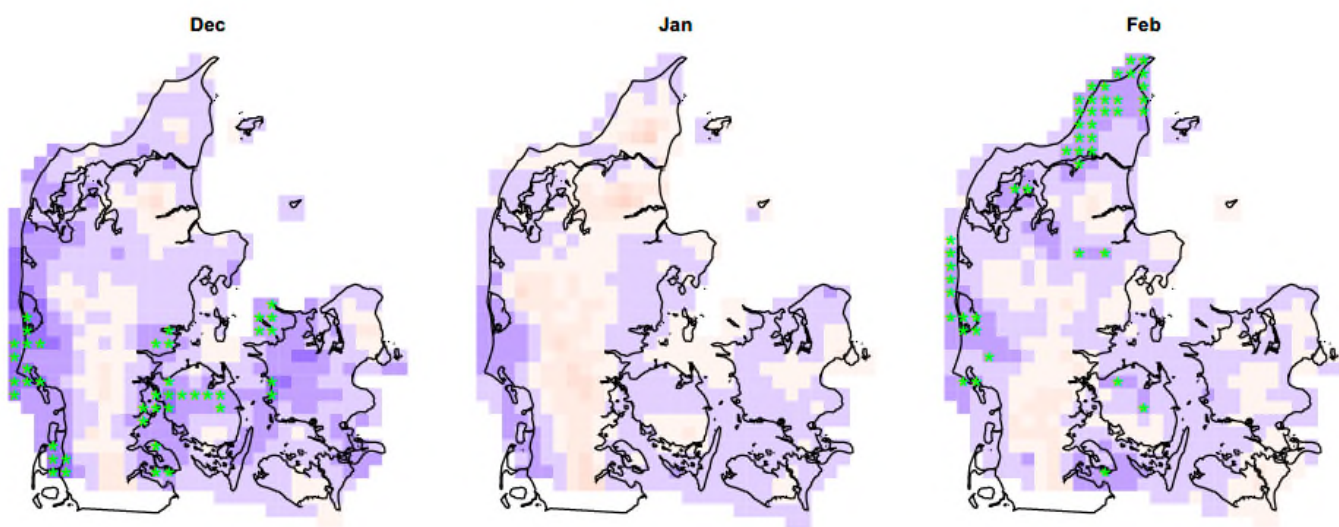

## Temperature

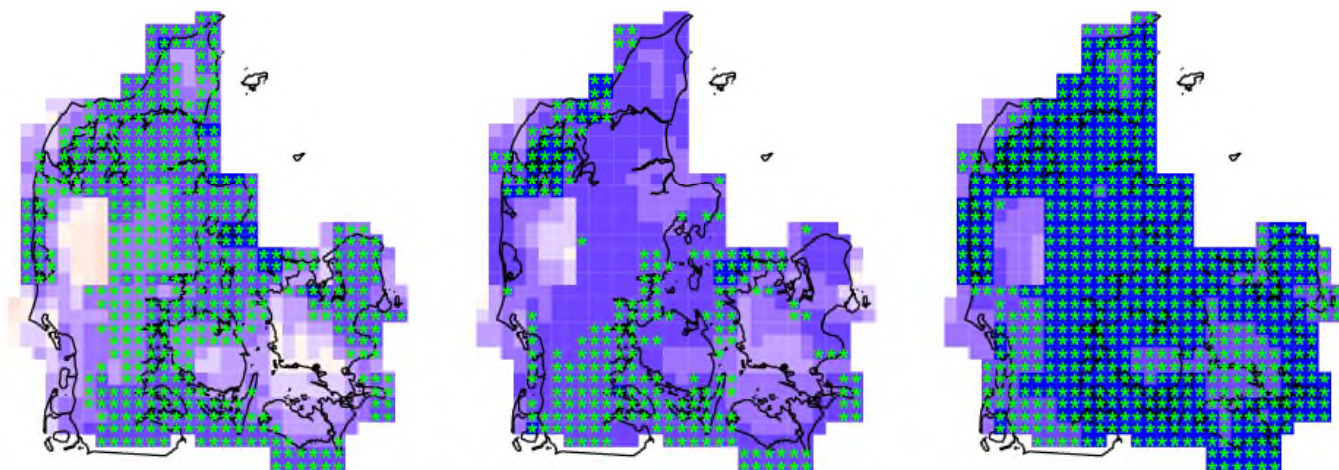

## Reference Evapotranspiration

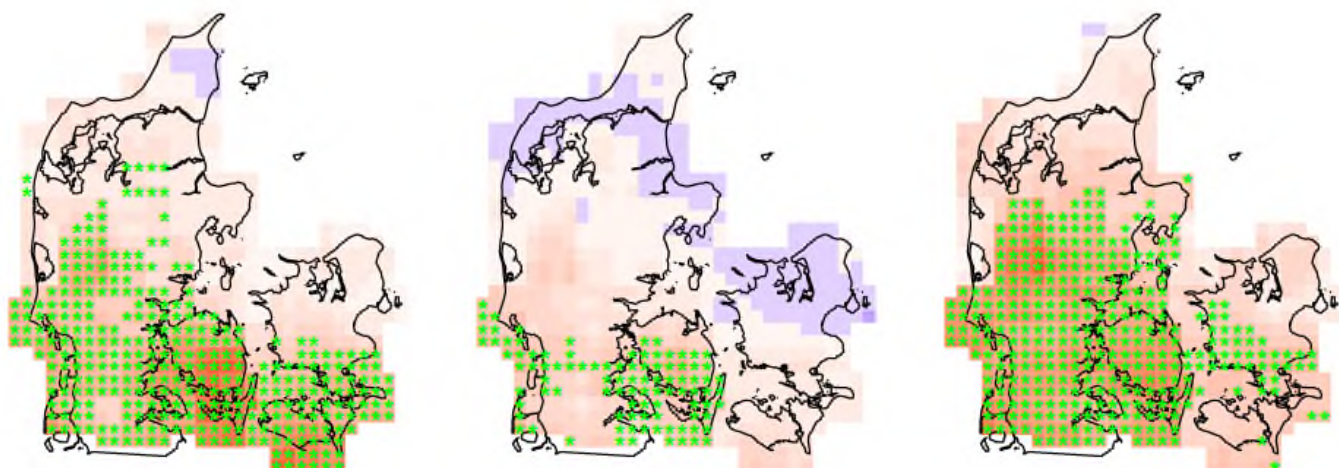

**Figure S6:** As in Fig. 6, but for winter.



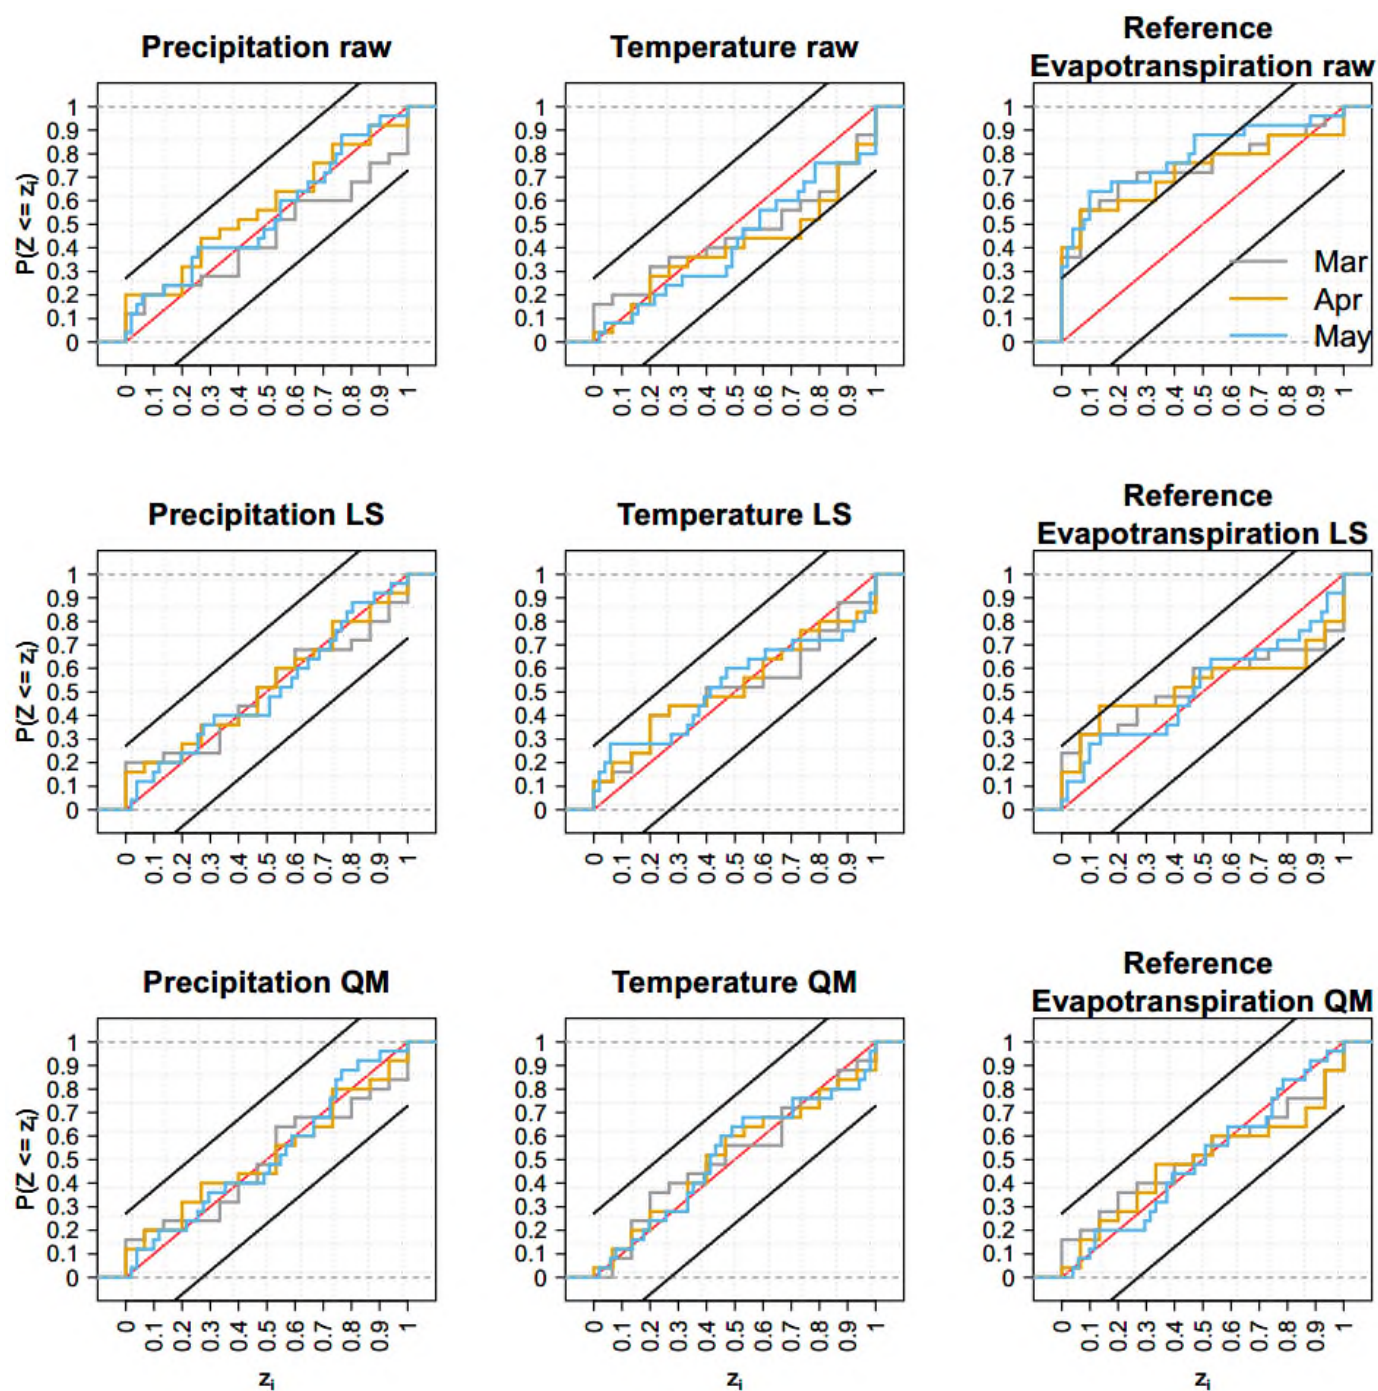

Figure S7: As in Fig. 7, but for spring.

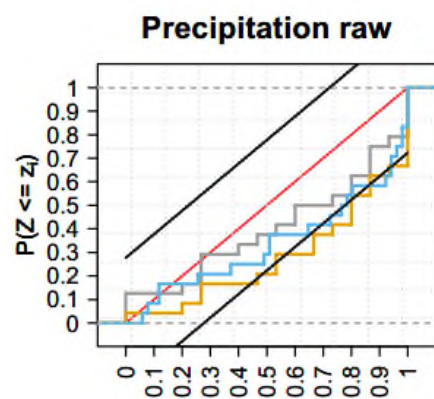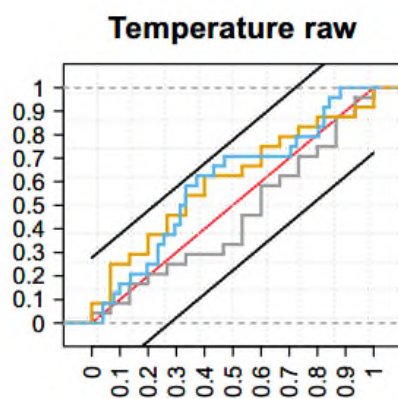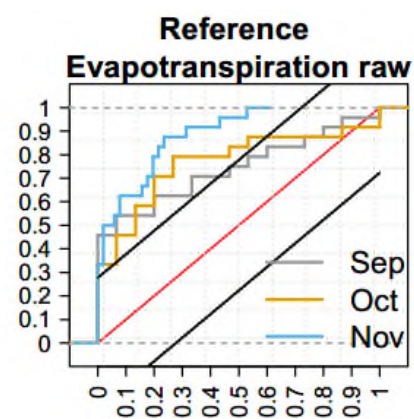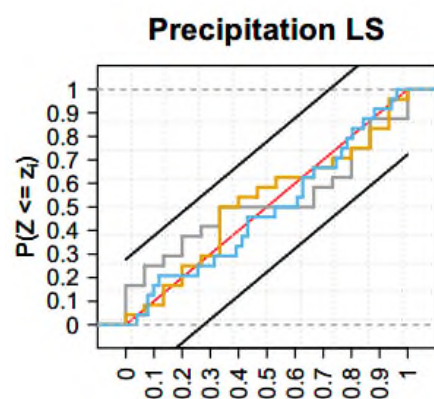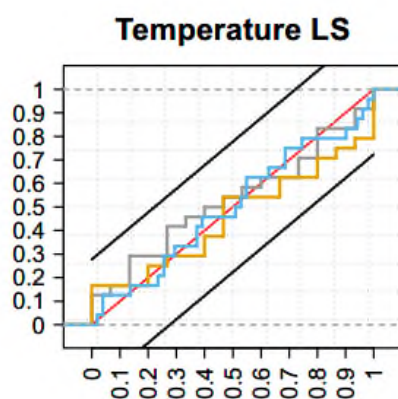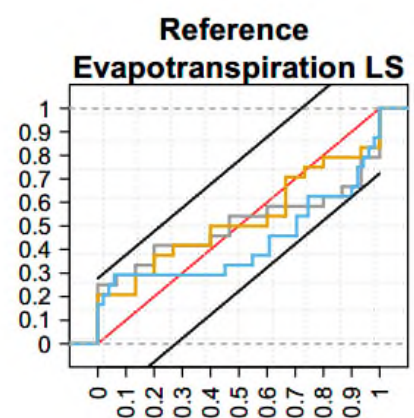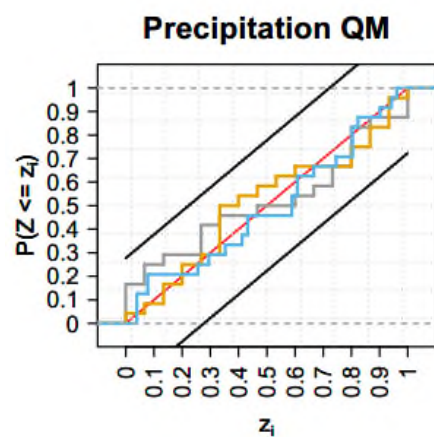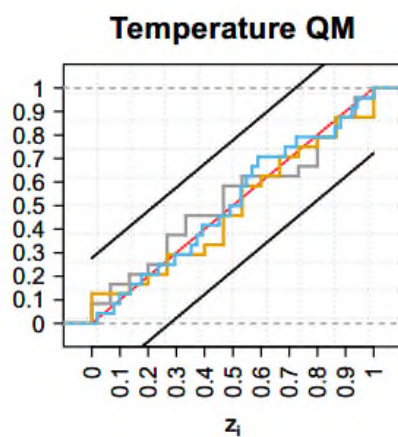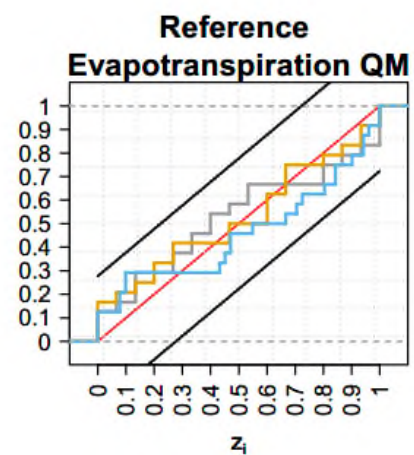



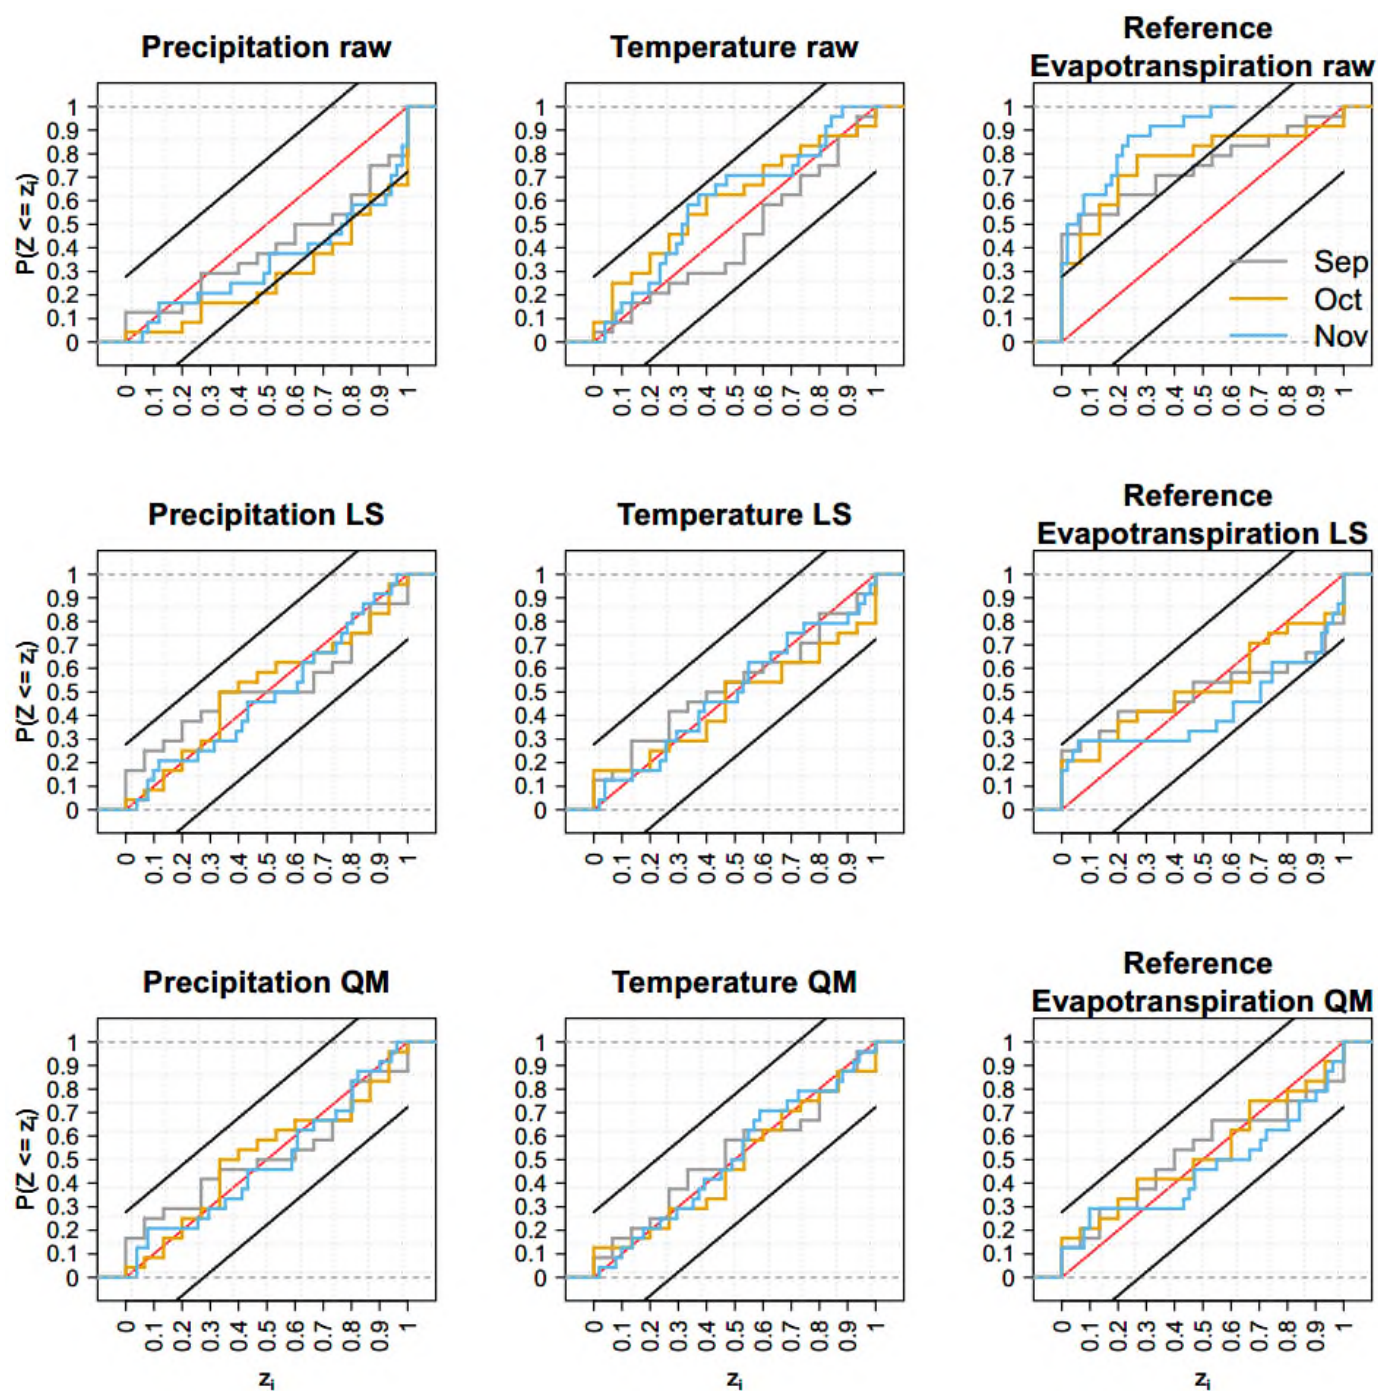

Figure S8: As in Fig. 7, but for autumn.

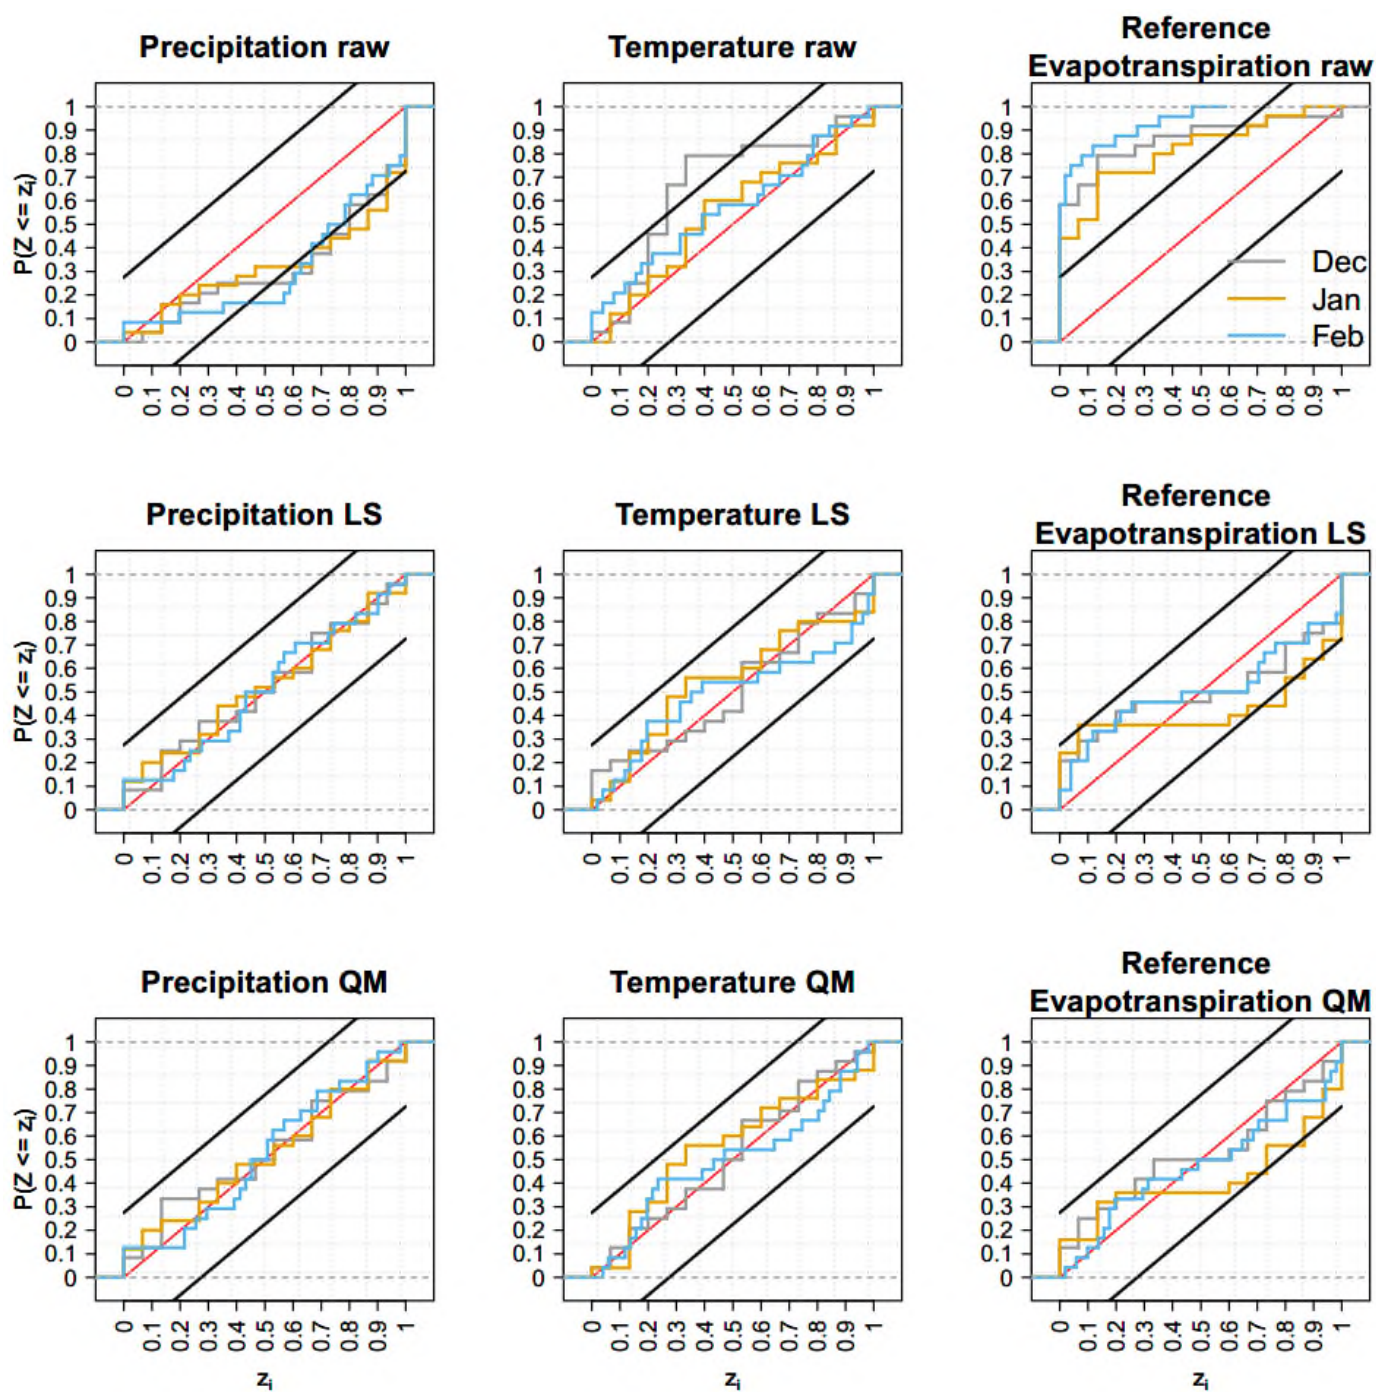

Figure S9: As in Fig. 7, but for winter.





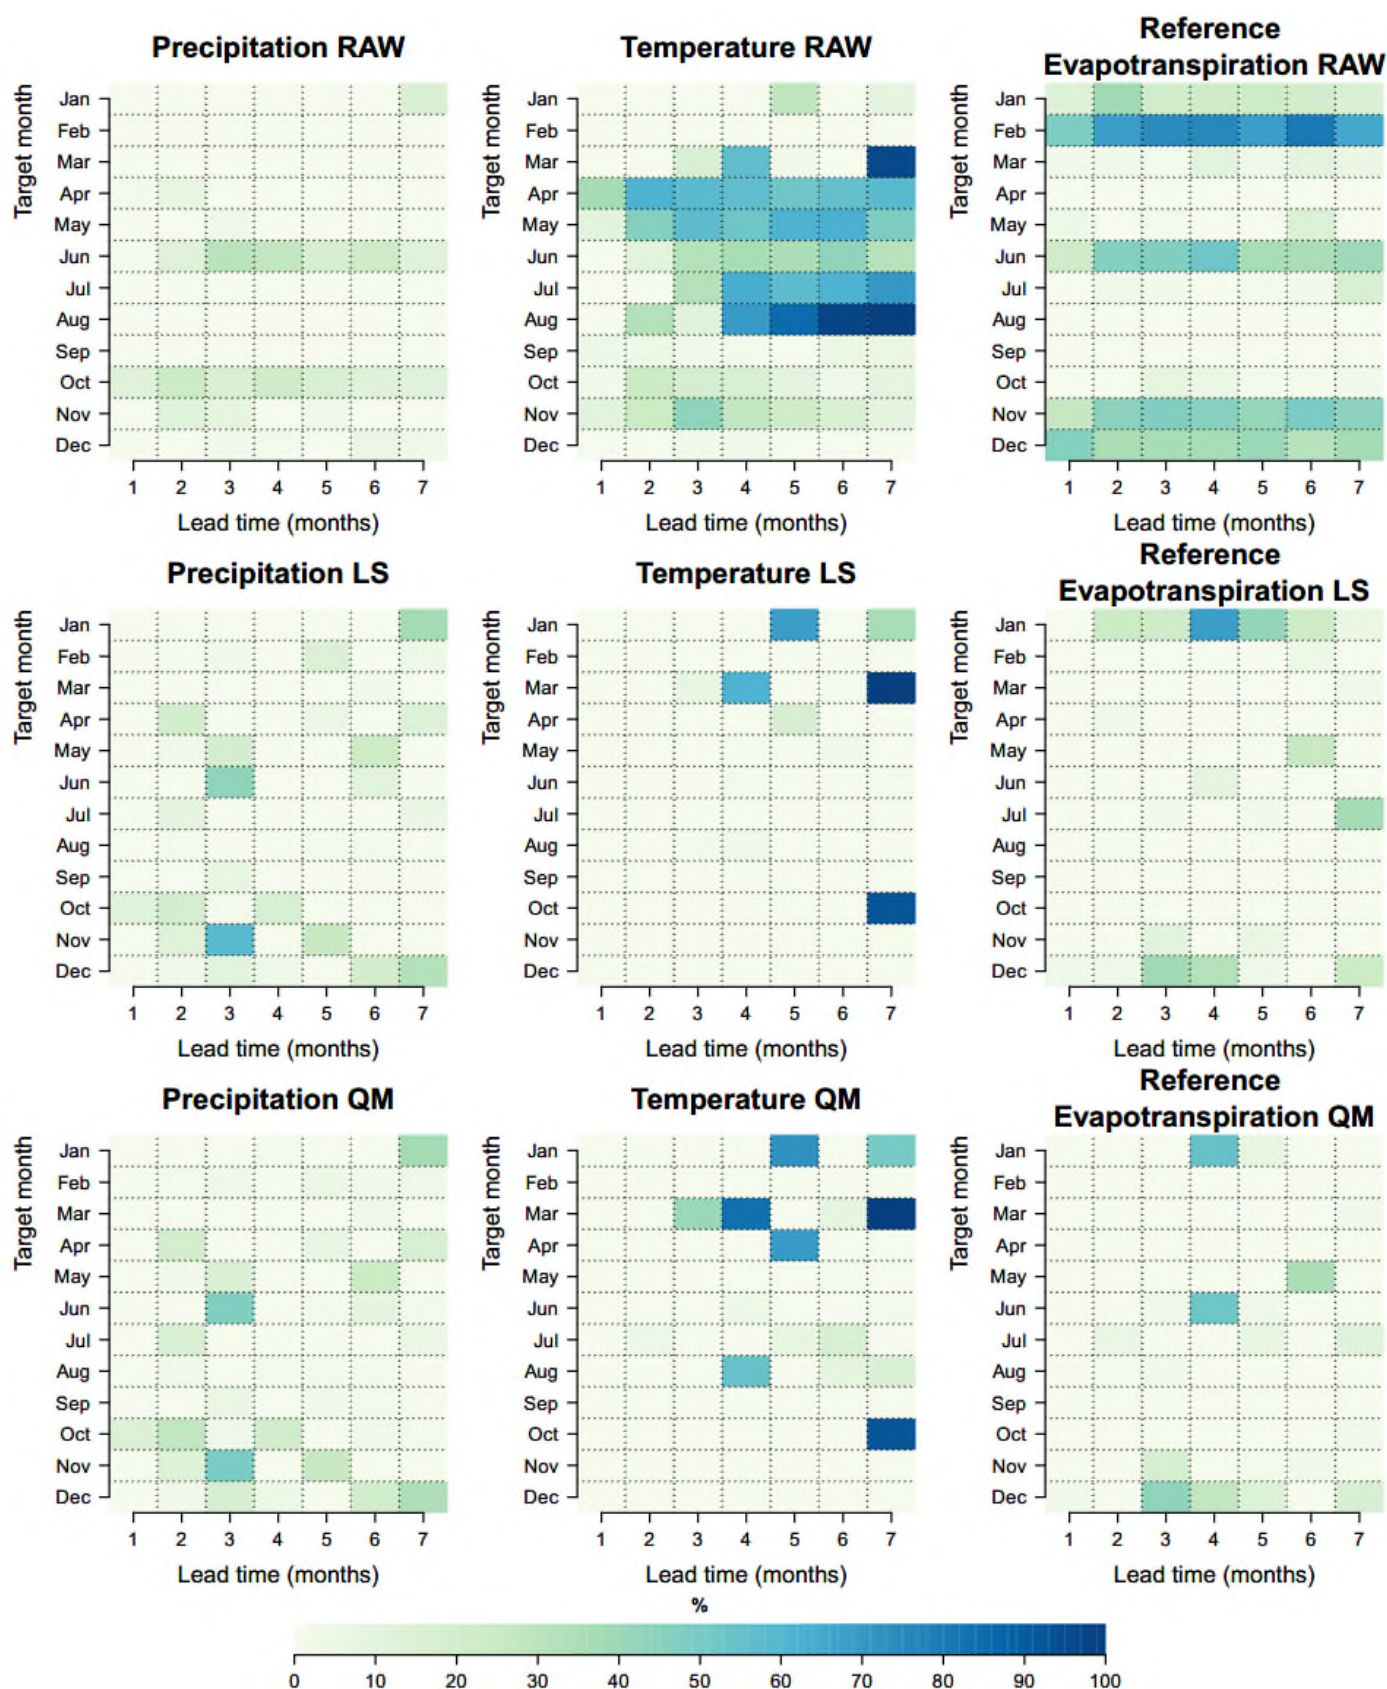

**Figure S10:** As in Fig. 9, but for negative accuracy (CRPSS in Eq. (8)).



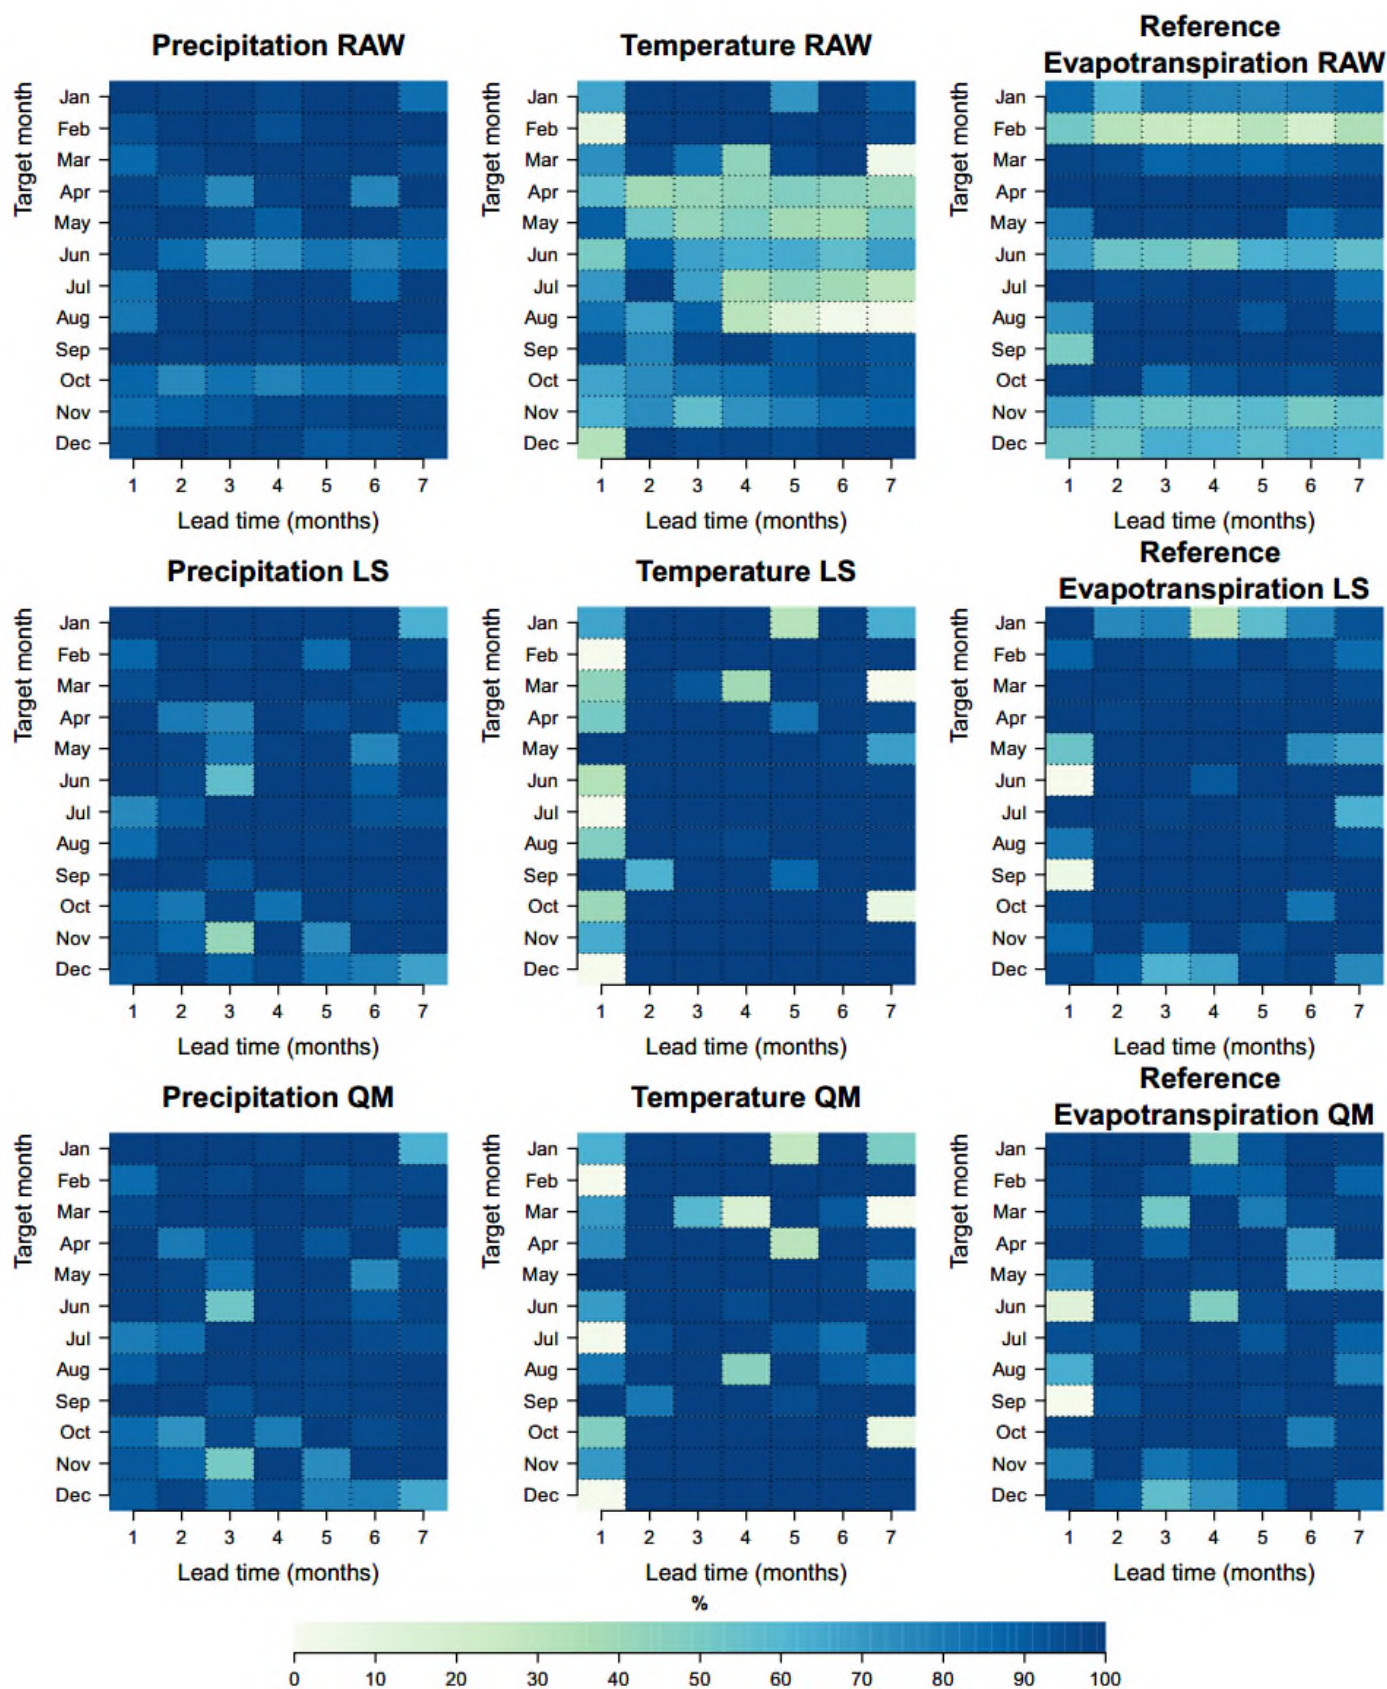



Figure S11: As in Fig. 9, but for equal accuracy (CRPSS in Eq. (8)).

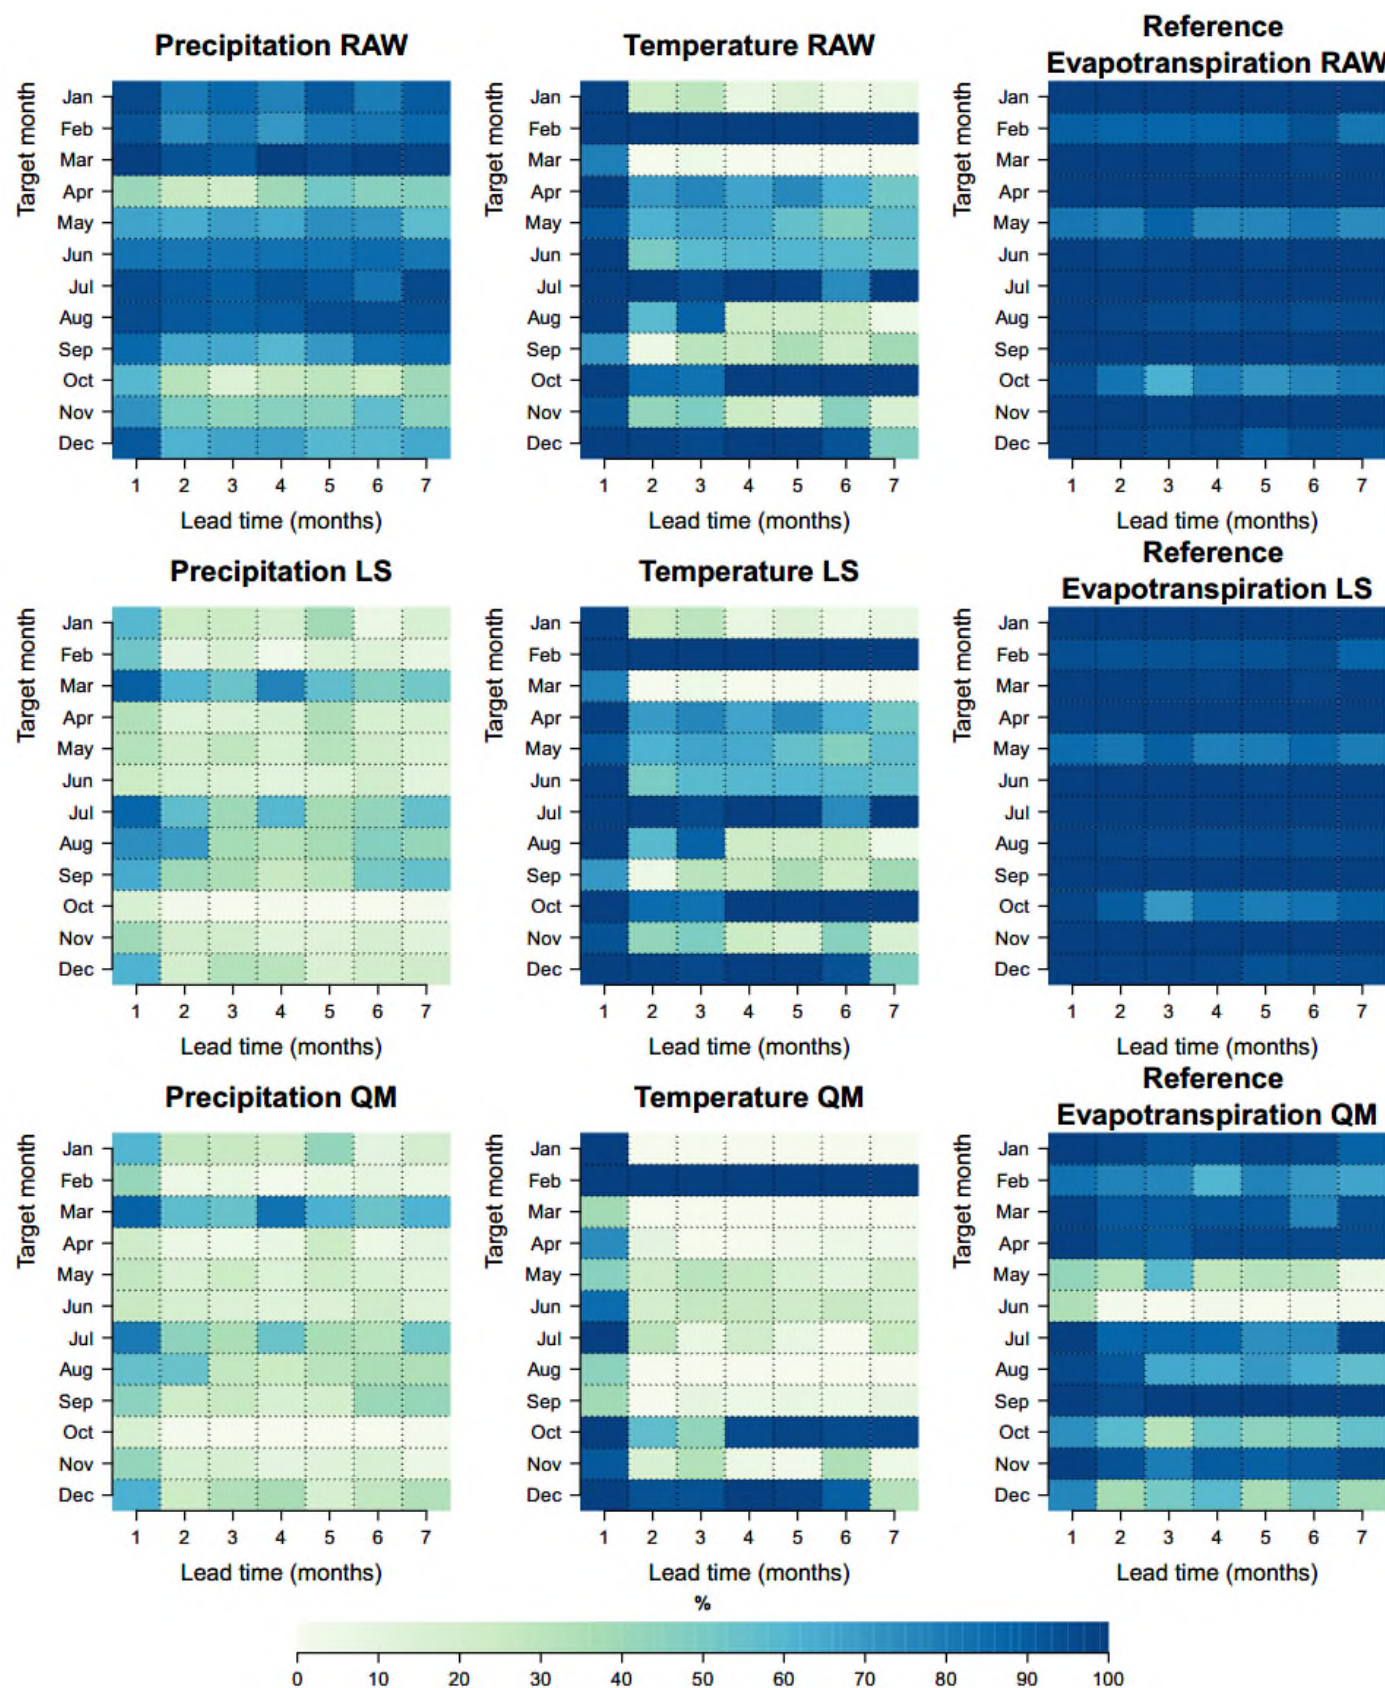



Figure S12: As in Fig. 9, but for positive sharpness (SS in Eq. (8)).

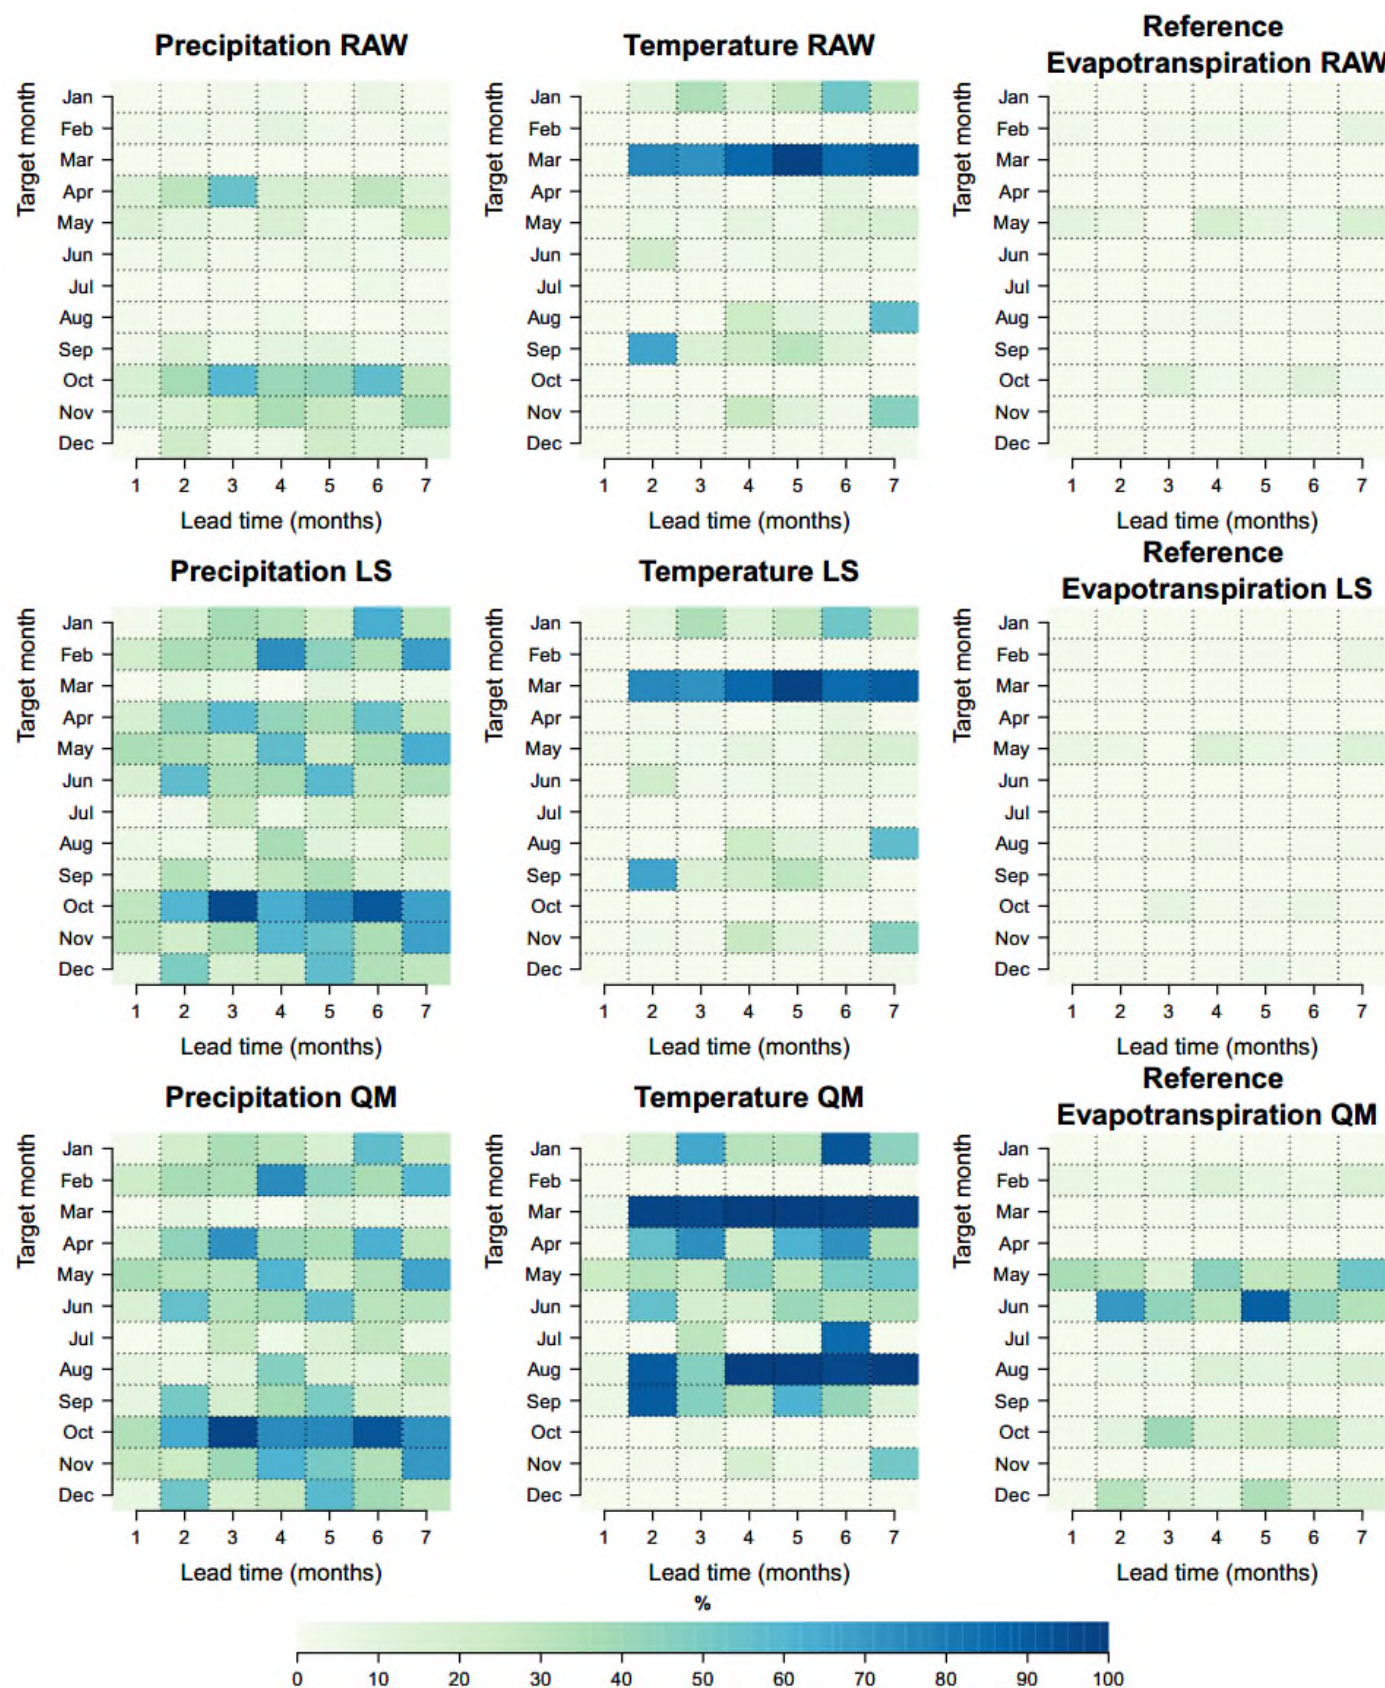



Figure S13: As in Fig. 9, but for negative sharpness (SS in Eq. (8)).

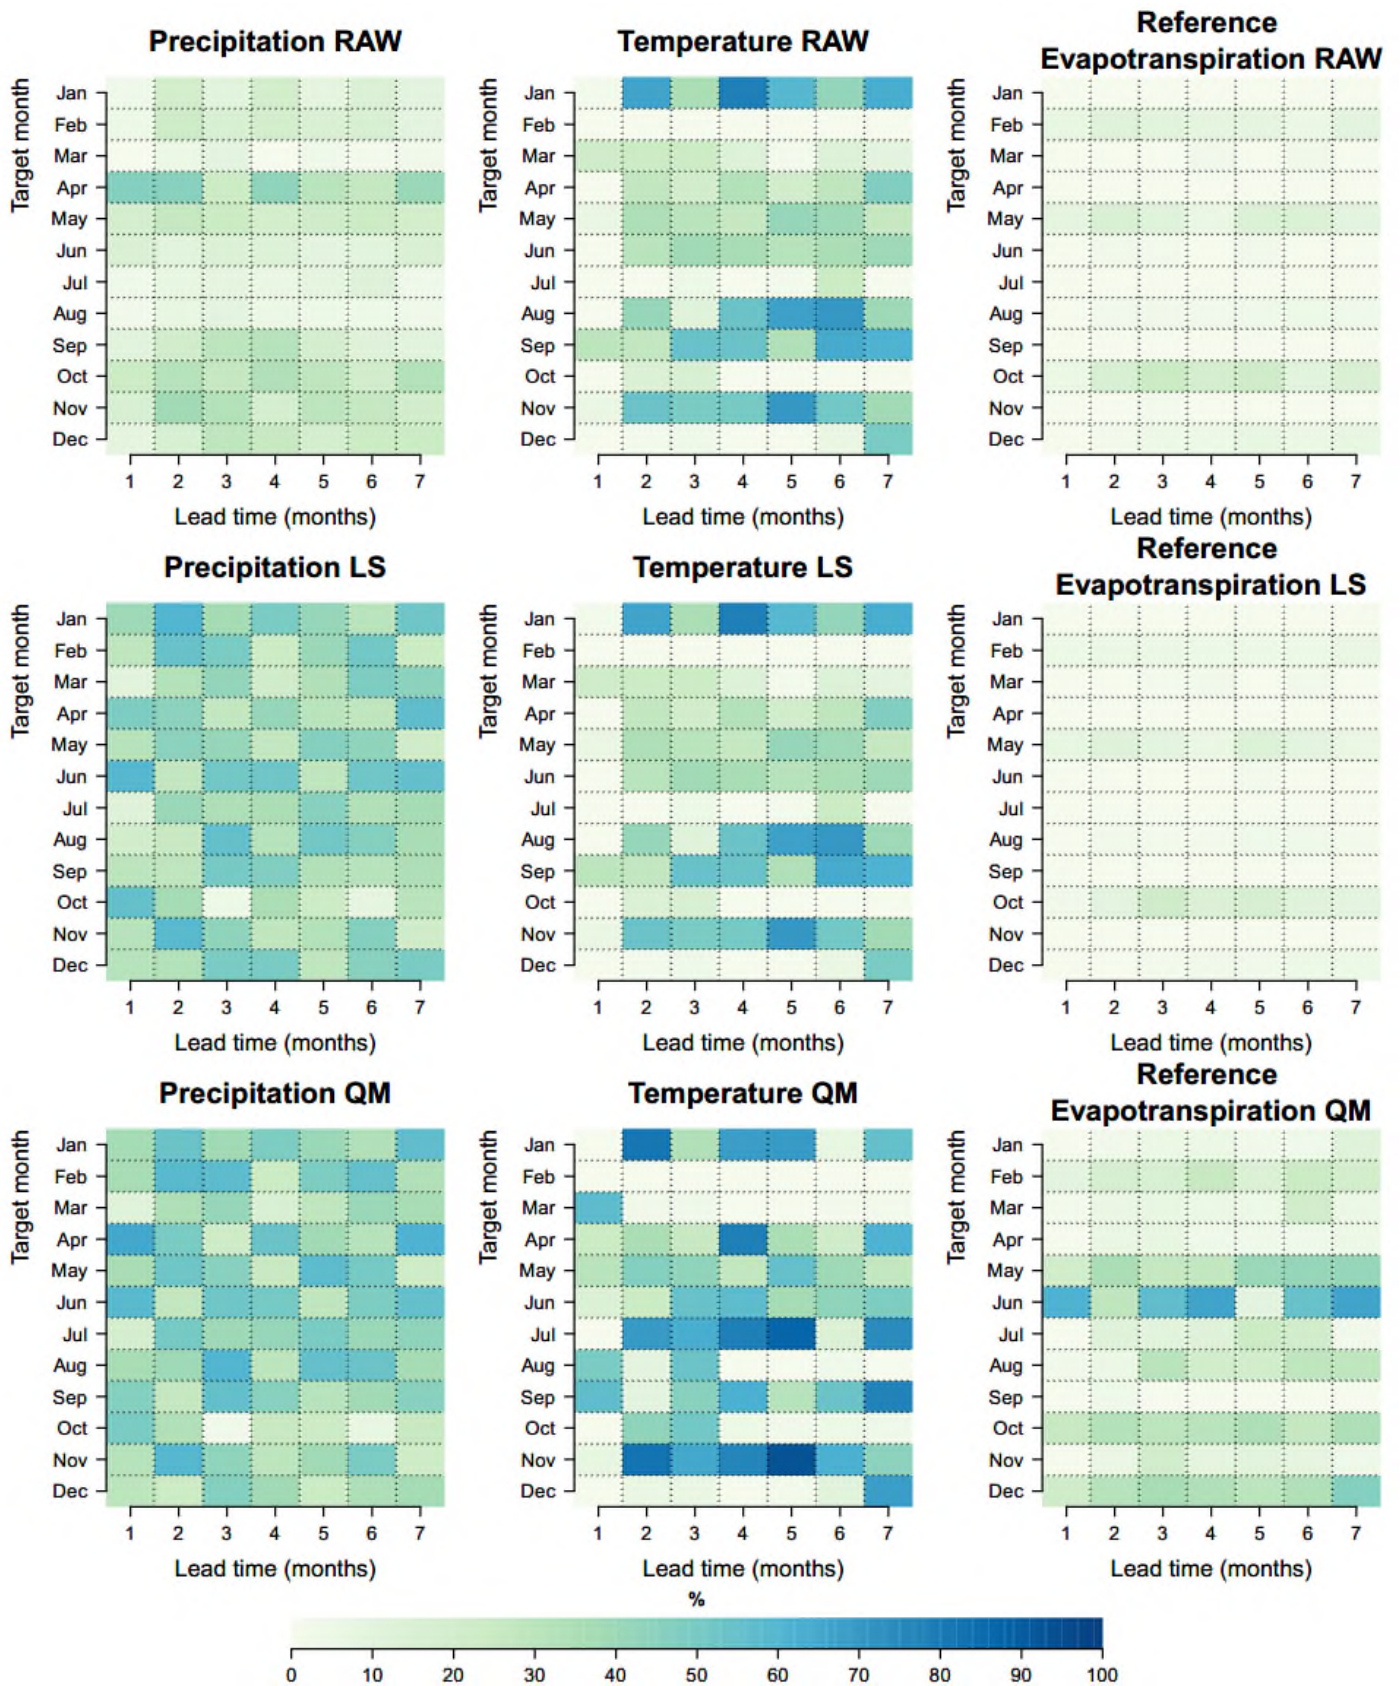

Figure S14: As in Fig. 9, but for equal sharpness (SS in Eq. (8)).
